# Supplementary material
Source: HighWire-hosted journal article supplement (https://dmd.aspetjournals.org/highwire/filestream/76513/field_highwire_adjunct_files/0/DMD283R1_Supp_PDF.pdf)
Supplement: DMD283R1_Supp_PDF.pdf [file DMD283R1_Supp_PDF.pdf]

**Title: *In vivo* gene expression profile of human intestinal epithelial cells: from the viewpoint of drug metabolism and pharmacokinetics**

**Authors: Kazuo Takayama, Kohei Ito, Akiko Matsui, Tomoki Yamashita, Kentaro Kawakami, Daisuke Hirayama, Wataru Kishimoto, Hiroshi Nakase, Hiroyuki Mizuguchi**

**Journal title: Drug Metabolism and Disposition**

**Manuscript number: DMD-AR-2020-000283**

**Figure S1**

**A**

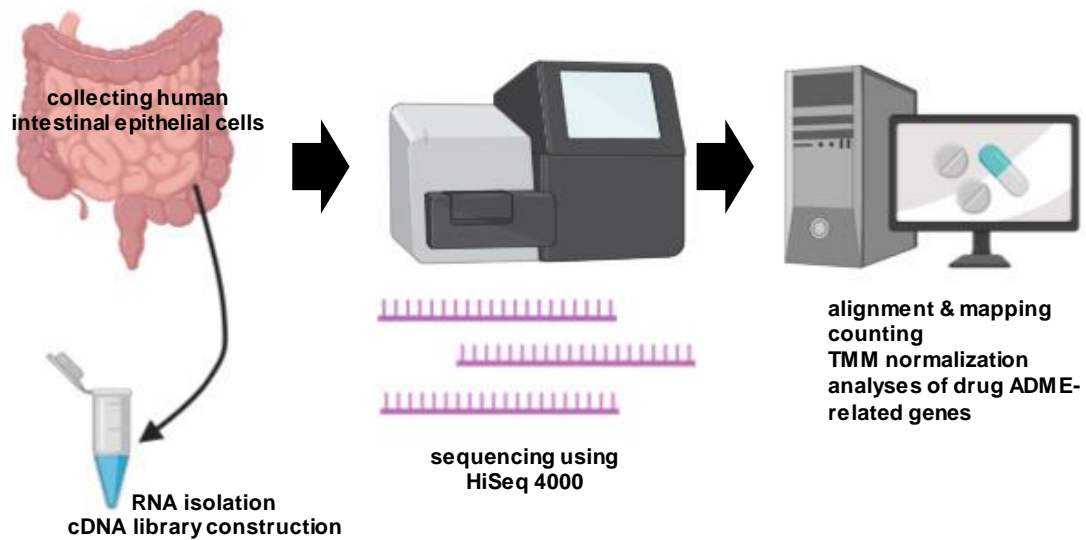

**B**

|                                |                                                                                        |
|--------------------------------|----------------------------------------------------------------------------------------|
| <b>sequencer</b>               | HiSeq 4000                                                                             |
| <b>library</b>                 | TruSeq Stranded Total RNA Library Prep Kit                                             |
| <b>single or paired</b>        | Single-end read                                                                        |
| <b>number of reads</b>         | 40-100 million                                                                         |
| <b>reference genome</b>        | Genome Reference Consortium Human (GRCh) Build 38                                      |
| <b>alignment &amp; mapping</b> | STAR RNA-seq aligner                                                                   |
| <b>counting</b>                | FeatureCounts / Subread                                                                |
| <b>normalization</b>           | TMM / edgeR                                                                            |
| <b>software</b>                | R studio/ R-3.5.2 (Counting, TMM normalization)<br>GeneSpring GX 14.9 (PCA)<br>TCC-GUI |

**Figure S1 Patient information and RNA-seq analysis**

(A) Working procedure of the sample collection and RNA-seq analysis. (B) Detailed information of the RNA-seq analysis. This figure was created using Biorender (<https://biorender.com>).

**Figure S2**

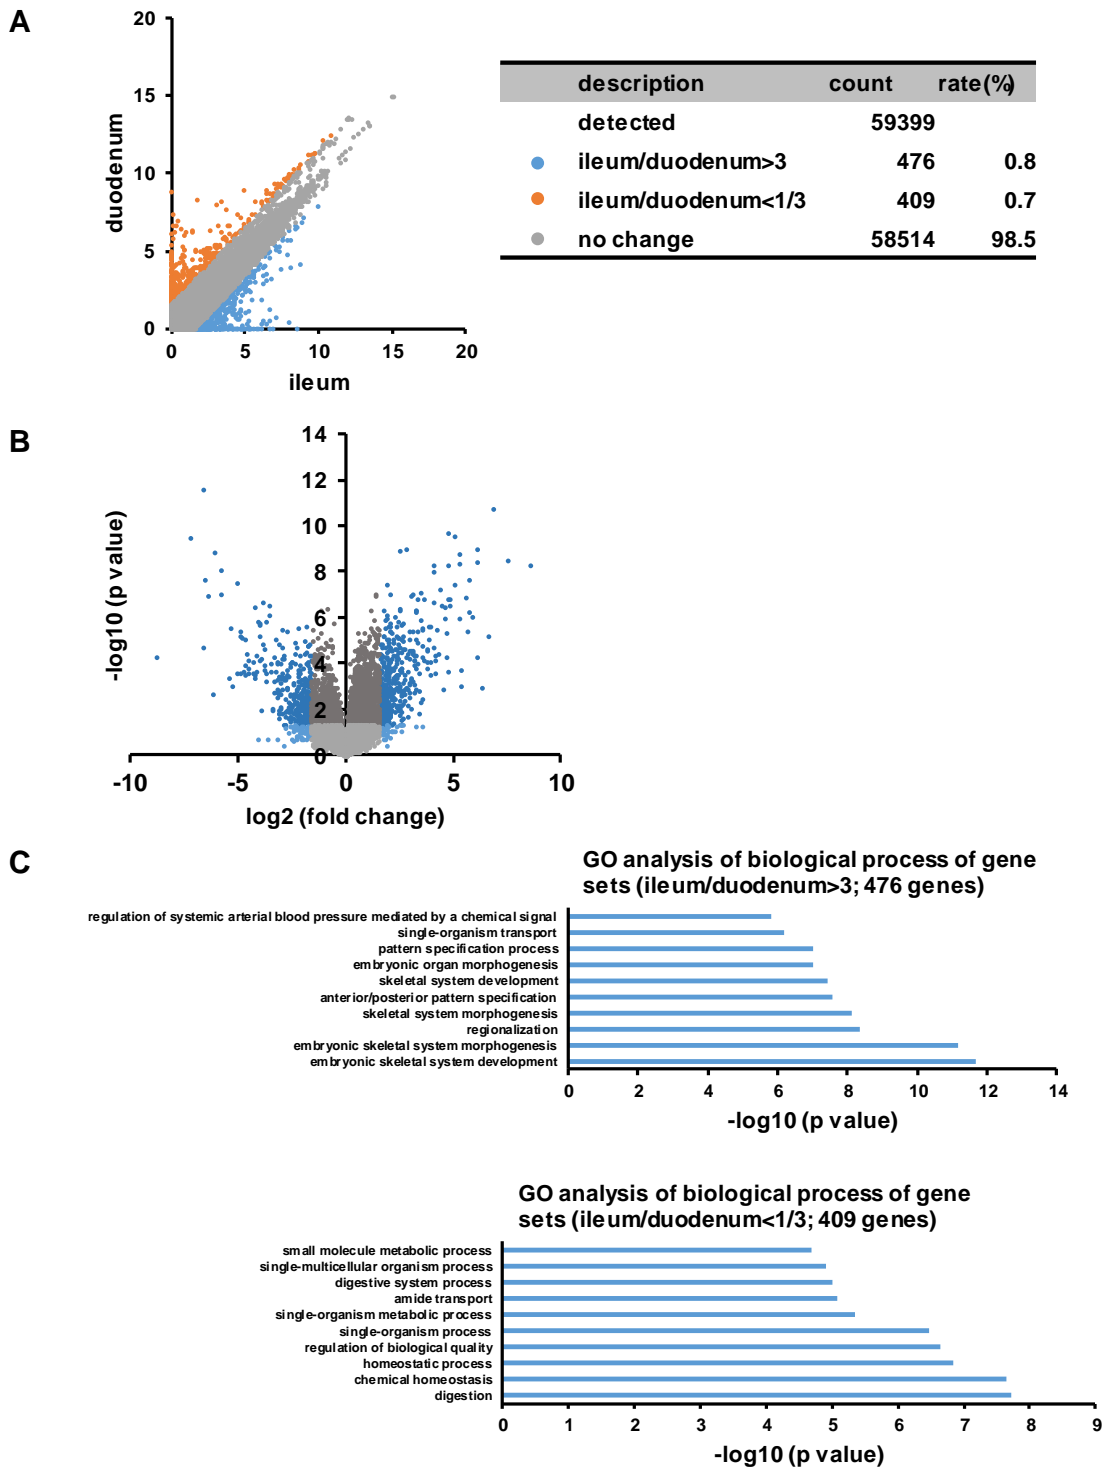

**Figure S2 Gene expression comparison between the ileum and duodenum**

(A) A scatter plot comparing gene expression levels in the ileum with those in the duodenum is shown. (B) A volcano plot comparing gene expression levels in the ileum

with those in the duodenum is shown. (C) GO analysis was performed for gene sets whose gene expression levels were increased more than three-fold or decreased less than three-fold.

**Figure S3**

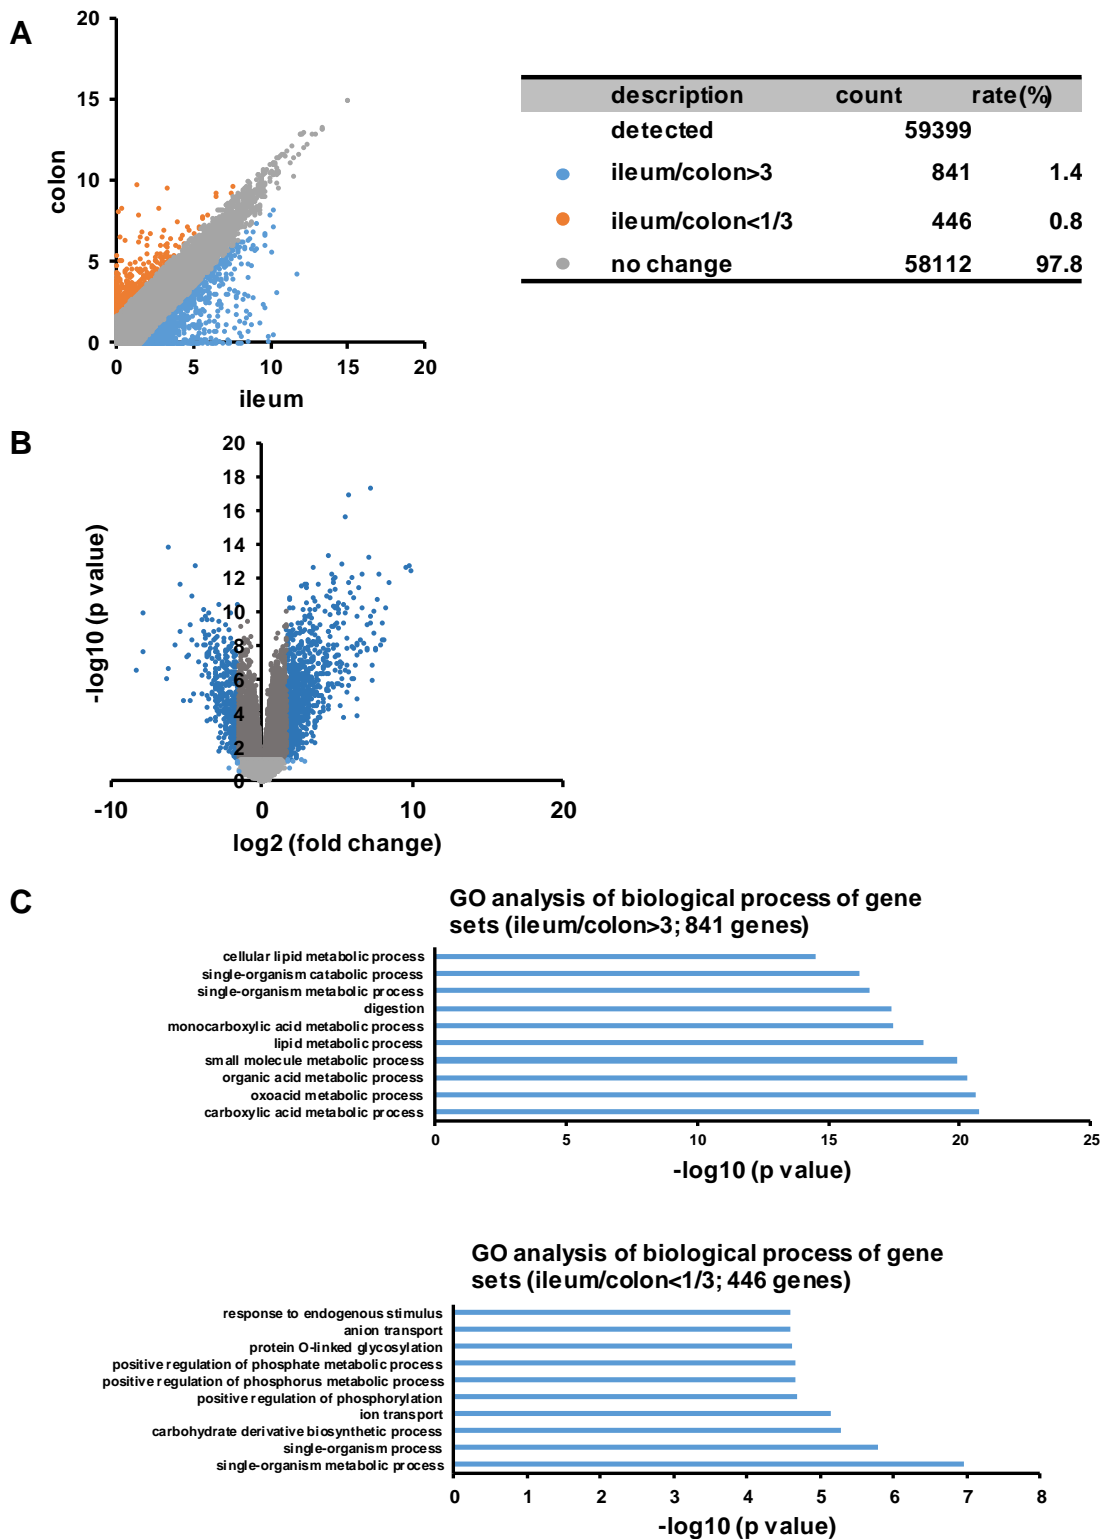

**Figure S3 Gene expression comparison between the ileum and colon**

(A) A scatter plot comparing gene expression levels in the ileum with those in the colon

is shown. (B) A volcano plot comparing gene expression levels in the ileum with those in the colon is shown. (C) GO analysis was performed for gene sets whose gene expression levels were increased more than three-fold or decreased less than three-fold.

**Figure S4**

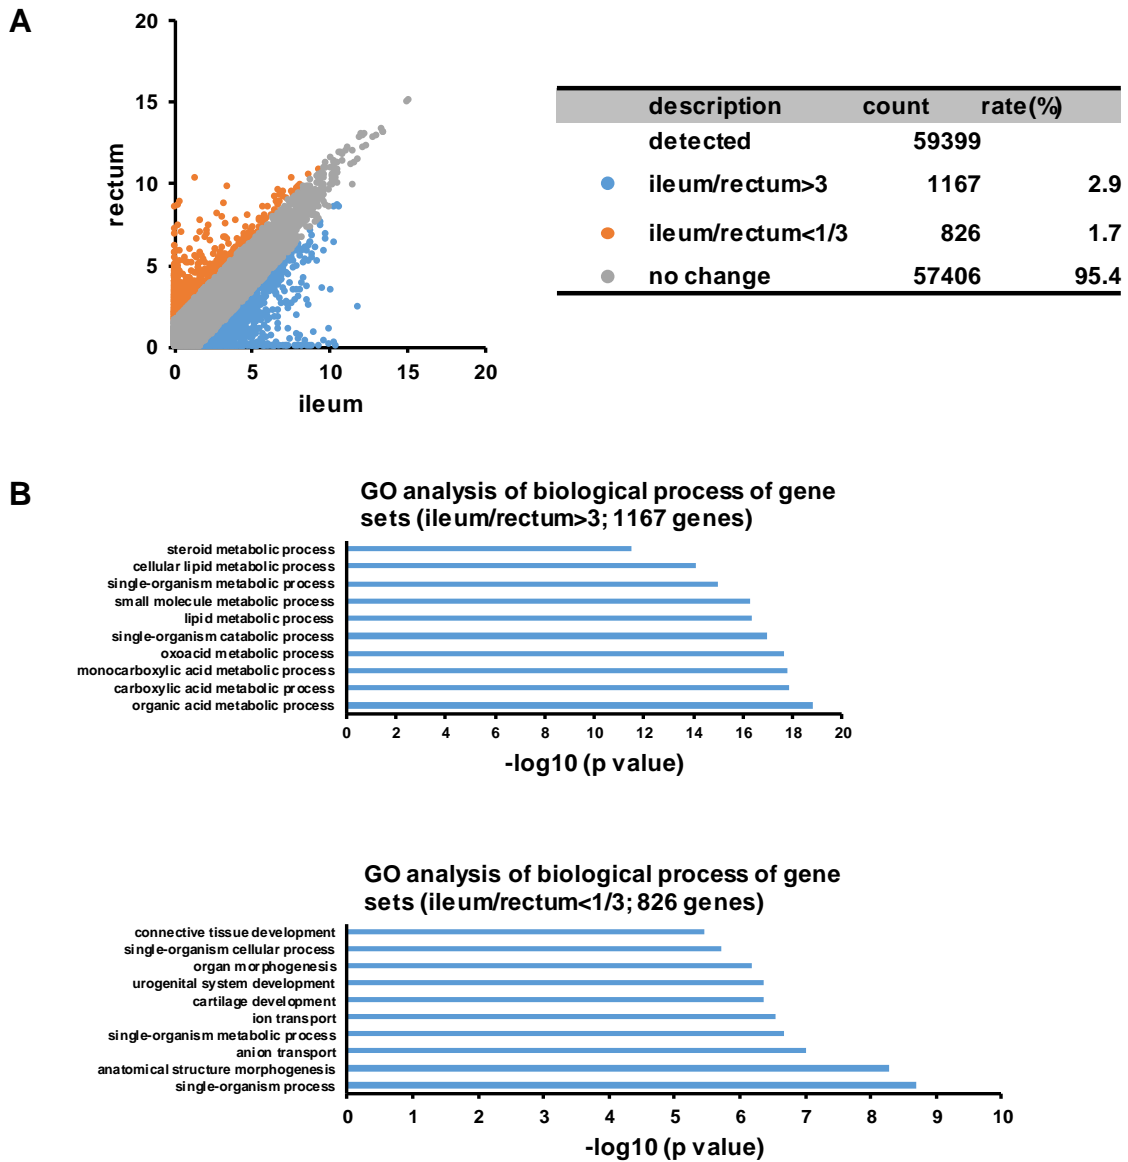

**Figure S4 Gene expression comparison between the ileum and rectum**

(A) A scatter plot comparing gene expression levels in the ileum with those in the rectum is shown. (B) GO analysis was performed for gene sets whose gene expression levels were increased more than three-fold or decreased less than three-fold.

**Figure S5**

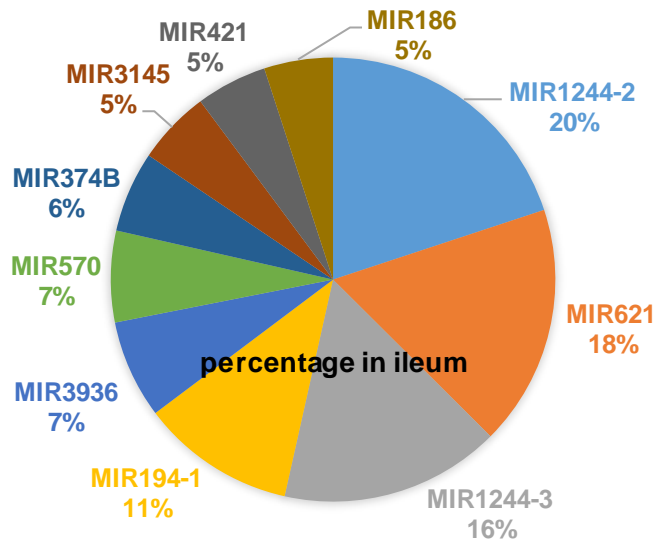

**Figure S5 Expression analysis of miRNAs in various regions of the intestinal tract**

The expression profile of miRNAs in the ileum is shown.
